# Supplementary material for: Drivers of soil organic carbon from temperate to alpine forests: a model-based analysis of the Swiss forest soil inventory with Yasso20
Source: Copernicus journal article supplement (doi:10.5194/egusphere-2024-3788), 2024-12-16
Supplement: Supplementary file 1 [file egusphere-2024-3788-supplement.pdf]

1 **Supplementary material** of “*Drivers of soil organic carbon from temperate to alpine forests: a*  
 2 *model-based analysis of the Swiss forest soil inventory with Yasso20*” (Guidi et al.)

3

4 **Table S1** (a) Principal component analysis (PCA) of  $n = 468$  sites (excluding waterlogged soils) for the  
 5 three principal components (PC) with eigenvalues  $>1$ , with highest loadings ( $> 0.4$ ) for each principal  
 6 component marked in **bold**, and (b) PCA-based analysis of total SOC stocks and Yasso20 deviations (i.e.  
 7 simulated minus measured values of total SOC stocks), tested with linear mixed-effect models with region  
 8 as random intercept.

9 (a) Principal component analysis (PCA)

|                 | PC1          | PC2         | PC3         |
|-----------------|--------------|-------------|-------------|
| Eigenvalue      | 3.5          | 2.4         | 1.5         |
| Variability (%) | 34.6         | 23.7        | 15.2        |
| Cumulative (%)  | 34.6         | 58.3        | 73.6        |
| <i>Loadings</i> |              |             |             |
| pH              | <b>0.48</b>  | -0.12       | 0.05        |
| Clay            | 0.33         | 0.06        | <b>0.44</b> |
| Fe              | <b>-0.40</b> | -0.04       | 0.36        |
| Al              | <b>-0.43</b> | 0.07        | 0.35        |
| Ca              | <b>0.47</b>  | -0.11       | 0.21        |
| MAT             | 0.07         | <b>0.58</b> | -0.09       |
| MAP             | -0.02        | 0.12        | <b>0.63</b> |
| NPP             | 0.05         | <b>0.58</b> | 0.13        |
| Broadleaf%      | 0.22         | <b>0.44</b> | -0.06       |
| Slope           | 0.20         | -0.29       | 0.28        |

10 (b) Statistical model including the three PCs

|                   | Total SOC stocks        |     |      |                  | Yasso20 deviations      |     |      |                  |
|-------------------|-------------------------|-----|------|------------------|-------------------------|-----|------|------------------|
|                   | All sites ( $n = 468$ ) |     |      |                  | All sites ( $n = 468$ ) |     |      |                  |
|                   | Estimate                | SE  | t    | <i>P</i>         | Estimate                | SE  | t    | <i>P</i>         |
| (Intercept)       | 13.5                    | 1.0 | 13.1 | <b>&lt;0.001</b> | -0.1                    | 1.3 | 0.0  | 0.96             |
| PC1               | -0.9                    | 0.3 | -3.3 | <b>&lt;0.001</b> | 0.7                     | 0.3 | 2.6  | <b>0.010</b>     |
| PC2               | -0.7                    | 0.4 | -1.9 | 0.06             | 0.6                     | 0.4 | 1.5  | 0.14             |
| PC3               | 2.8                     | 0.3 | 9.3  | <b>&lt;0.001</b> | -2.4                    | 0.3 | -7.6 | <b>&lt;0.001</b> |
| DF                | 460                     |     |      |                  | 460                     |     |      |                  |
| marginal $R^2$    | 0.21                    |     |      |                  | 0.14                    |     |      |                  |
| conditional $R^2$ | 0.33                    |     |      |                  | 0.31                    |     |      |                  |
| RMSE              | 5.3                     |     |      |                  | 5.5                     |     |      |                  |

11 Model estimates, standard errors (SE), t statistic and *P*-values are reported ( $P < 0.05$  highlighted in **bold**).

12 DF is the degrees of freedom. Marginal  $R^2$  considers the variance of the fixed effects, while conditional  $R^2$  both the  
 13 fixed and random effects calculated using the R package *performance* (Lüdtke et al., 2021).

14 RMSE is the root mean squared error.

15 **Table S2. Additional analysis of drivers of total SOC stocks considering factor interactions.** Effects  
16 of soil properties in the upper 30 cm mineral soil (i.e. pH, clay content, exchangeable contents of Fe and  
17 Ca), MAT (mean annual temperature), MAP (mean annual precipitation), NPP (net primary production)  
18 percentage of broadleaves and slope, including the interactions, on total SOC stocks (kg C m<sup>-2</sup>). Linear  
19 mixed-effect models with region as random intercept were developed separately for (i) all sites excluding  
20 waterlogged soils, and (ii) sites with pH ≤ 5. Only two-way interactions that decreased the Bayesian  
21 Information Criterion (BIC) were included in the final statistical model. For sites with pH > 5, no model  
22 was developed since interactions did not decrease the BIC.

|                                 | All sites ( <i>n</i> = 468) |      |      |                | pH ≤ 5 ( <i>n</i> = 287) |       |      |          |                |
|---------------------------------|-----------------------------|------|------|----------------|--------------------------|-------|------|----------|----------------|
|                                 | Estimate                    | SE   | t    | <i>P</i>       | Estimate                 | SE    | t    | <i>P</i> |                |
| (Intercept)                     | 9.01                        | 1.23 | 7.3  | < <b>0.001</b> | (Intercept)              | 12.45 | 0.91 | 13.7     | < <b>0.001</b> |
| pH                              | -2.64                       | 0.68 | -3.9 | < <b>0.001</b> | pH                       | -0.45 | 1.26 | -0.4     | 0.72           |
| log(Clay)                       | -0.82                       | 0.58 | -1.4 | 0.16           | log(Clay)                | -1.48 | 0.78 | -1.9     | 0.06           |
| sqrt(Fe)                        | 4.49                        | 0.71 | 6.4  | < <b>0.001</b> | sqrt(Fe)                 | 4.93  | 0.94 | 5.2      | < <b>0.001</b> |
| log(Ca)                         | 2.59                        | 0.41 | 6.4  | < <b>0.001</b> | log(Ca)                  | -0.23 | 0.29 | -0.8     | 0.43           |
| MAT                             | 0.02                        | 0.20 | 0.1  | 0.93           | MAT                      | -0.39 | 0.27 | -1.4     | 0.15           |
| MAP                             | 0.01                        | 0.00 | 6.4  | < <b>0.001</b> | MAP                      | 0.01  | 0.00 | 6.6      | < <b>0.001</b> |
| NPP                             | -1.40                       | 4.13 | -0.3 | 0.73           | NPP                      | 2.12  | 4.98 | 0.4      | 0.67           |
| Broadleaf%                      | -0.02                       | 0.01 | -2.2 | <b>0.027</b>   | Broadleaf%               | -0.01 | 0.01 | -0.8     | 0.45           |
| sqrt(Slope)                     | -0.41                       | 0.10 | -4.1 | < <b>0.001</b> | sqrt(Slope)              | -0.46 | 0.13 | -3.5     | < <b>0.001</b> |
| log(Clay)*MAP                   | -0.01                       | 0.00 | -4.3 | < <b>0.001</b> | log(Clay)*MAP            | -0.01 | 0.00 | -4.1     | < <b>0.001</b> |
| pH*log(Ca)                      | 1.80                        | 0.26 | 7.0  | < <b>0.001</b> | #                        | #     | #    | #        | #              |
| #                               | #                           | #    | #    | #              | pH*sqrt(Fe)              | -6.44 | 1.55 | -4.15    | < <b>0.001</b> |
| DF                              | 452                         |      |      |                |                          | 271   |      |          |                |
| marginal R <sup>2</sup>         | 0.38                        |      |      |                |                          | 0.53  |      |          |                |
| conditional R <sup>2</sup>      | 0.50                        |      |      |                |                          | 0.60  |      |          |                |
| RMSE<br>(kg C m <sup>-2</sup> ) | 4.6                         |      |      |                |                          | 4.4   |      |          |                |

23 Model estimates, standard errors (SE), t statistic and *P*-values are reported (*P* < 0.05 highlighted in **bold**).

24 Measurement units of independent variables are reported in Table 1.

25 DF is the degrees of freedom. Marginal R<sup>2</sup> includes the variance of the fixed effects, while conditional R<sup>2</sup> both the  
26 fixed and random effects calculated with the R package *performance* (Lüdtke et al., 2021).

27 RMSE is the root mean squared error.

28 The symbol “#” indicates that an interaction was excluded from the model since it did not decrease the BIC.

29 **Table S3. Additional analysis of drivers of Yasso20 deviations considering factor interactions.** Effects of soil properties in the upper 30 cm  
30 mineral soil (i.e. pH, clay content, exchangeable contents of Fe and Ca), MAT (mean annual temperature), MAP (mean annual precipitation),  
31 percentage of broadleaves and slope, including the interactions, on Yasso20 deviations (i.e. simulated minus measured values of total SOC stocks)  
32 in kg C m<sup>-2</sup>. Linear mixed-effect models with region as random intercept were developed separately for (i) all sites excluding waterlogged soils, (ii)  
33 sites with pH ≤ 5, and (iii) sites with pH > 5. Only two-way interactions that decreased the Bayesian Information Criterion (BIC) were included in  
34 the final statistical model.

|                                 | All sites ( <i>n</i> = 468) |      |      |                  | pH ≤ 5 ( <i>n</i> = 287) |       |      |          | pH > 5 ( <i>n</i> = 181) |             |       |          |      |                  |
|---------------------------------|-----------------------------|------|------|------------------|--------------------------|-------|------|----------|--------------------------|-------------|-------|----------|------|------------------|
|                                 | Estimate                    | SE   | t    | <i>P</i>         | Estimate                 | SE    | t    | <i>P</i> | Estimate                 | SE          | t     | <i>P</i> |      |                  |
| (Intercept)                     | 3.99                        | 1.56 | 2.6  | <b>0.011</b>     | (Intercept)              | 0.92  | 1.08 | 0.9      | 0.40                     | (Intercept) | -0.74 | 2.67     | -0.3 | 0.78             |
| pH                              | 2.27                        | 0.70 | 3.2  | <b>0.001</b>     | pH                       | 0.20  | 1.29 | 0.2      | 0.88                     | pH          | -1.32 | 0.72     | -1.8 | 0.07             |
| log(Clay)                       | 1.14                        | 0.60 | 1.9  | 0.06             | log(Clay)                | 1.74  | 0.80 | 2.2      | <b>0.030</b>             | Clay        | -0.03 | 0.04     | -0.7 | 0.49             |
| sqrt(Fe)                        | -4.74                       | 0.73 | -6.5 | <b>&lt;0.001</b> | sqrt(Fe)                 | -5.30 | 0.96 | -5.5     | <b>&lt;0.001</b>         | sqrt(Fe)    | -6.30 | 3.59     | -1.8 | 0.08             |
| log(Ca)                         | -2.58                       | 0.42 | -6.2 | <b>&lt;0.001</b> | log(Ca)                  | -0.02 | 0.29 | -0.1     | 0.95                     | Ca          | -0.02 | 0.00     | -4.7 | <b>&lt;0.001</b> |
| MAT                             | -0.48                       | 0.17 | -2.7 | <b>0.007</b>     | MAT                      | -0.18 | 0.25 | -0.7     | 0.47                     | MAT         | -0.58 | 0.25     | -2.4 | <b>0.020</b>     |
| MAP                             | -0.01                       | 0.00 | -5.5 | <b>&lt;0.001</b> | MAP                      | -0.01 | 0.00 | -6.2     | <b>&lt;0.001</b>         | MAP         | 0.00  | 0.00     | -2.1 | <b>0.037</b>     |
| Broadleaf%                      | 0.02                        | 0.01 | 2.6  | <b>0.011</b>     | Broadleaf%               | 0.01  | 0.01 | 1.0      | 0.34                     | Broadleaf%  | 0.03  | 0.01     | 2.8  | <b>0.006</b>     |
| sqrt(Slope)                     | 0.42                        | 0.10 | 4.1  | <b>&lt;0.001</b> | sqrt(Slope)              | 0.46  | 0.14 | 3.4      | <b>&lt;0.001</b>         | Slope       | 0.04  | 0.02     | 2.9  | <b>0.004</b>     |
| log(Clay)*MAP                   | 0.01                        | 0.00 | 3.7  | <b>&lt;0.001</b> | log(Clay)*MAP            | 0.01  | 0.00 | 3.8      | <b>&lt;0.001</b>         | #           | #     | #        | #    | #                |
| pH*log(Ca)                      | -1.64                       | 0.26 | -6.2 | <b>&lt;0.001</b> | #                        | #     | #    | #        | #                        | pH*log(Ca)  | -0.01 | 0.00     | -2.9 | <b>0.004</b>     |
| #                               | #                           | #    | #    | #                | pH*sqrt(Fe)              | 5.48  | 1.58 | 3.5      | <b>&lt;0.001</b>         | #           | #     | #        | #    | #                |
| DF                              | 453                         |      |      |                  |                          | 272   |      |          |                          |             | 167   |          |      |                  |
| marginal R <sup>2</sup>         | 0.31                        |      |      |                  |                          | 0.48  |      |          |                          |             | 0.20  |          |      |                  |
| conditional R <sup>2</sup>      | 0.51                        |      |      |                  |                          | 0.58  |      |          |                          |             | 0.69  |          |      |                  |
| RMSE<br>(kg C m <sup>-2</sup> ) | 4.7                         |      |      |                  |                          | 4.5   |      |          |                          |             | 4.5   |          |      |                  |

35 Model estimates, standard errors (SE), t statistic and *P*-values are reported (*P* < 0.05 highlighted in **bold**).

36 Measurement units of independent variables are reported in Table 1.

37 DF is the degrees of freedom. Marginal R<sup>2</sup> includes the variance of the fixed effects, while conditional R<sup>2</sup> both the fixed and random effects calculated with the R  
38 package *performance* (Lüdtke et al., 2021).

39 RMSE is the root mean squared error.

40 The symbol “#” indicates that an interaction was excluded from the model since it did not decrease the BIC.

41 **Table S4. Additional analysis of drivers of total SOC stocks and Yasso20 deviations for sites (i)**  
42 **excluding Southern Alps, and (ii) including waterlogged soils.** Effects of soil properties in the upper 30  
43 cm mineral soil (i.e. pH, clay content, exchangeable contents of Fe and Ca), MAT (mean annual  
44 temperature), MAP (mean annual precipitation), NPP (net primary production), percentage of broadleaves  
45 and slope on (a) total SOC stocks, and (b) Yasso20 deviations (i.e. simulated minus measured values of  
46 total SOC stocks) in kg C m<sup>-2</sup>. Linear mixed-effect models with region as random intercept were developed  
47 separately for (i) sites excluding Southern Alps and waterlogged soils ( $n = 437$ ), and (ii) all sites including  
48 waterlogged soils ( $n = 556$ ).

49 (a) Total SOC stocks

|                              | Sites excluding Southern Alps<br>( $n = 437$ ) |      |      |                | Sites including waterlogged<br>( $n = 556$ ) |       |      |          |                |
|------------------------------|------------------------------------------------|------|------|----------------|----------------------------------------------|-------|------|----------|----------------|
|                              | Estimate                                       | SE   | t    | <i>P</i>       | Estimate                                     | SE    | t    | <i>P</i> |                |
| (Intercept)                  | 12.65                                          | 0.77 | 16.5 | < <b>0.001</b> | (Intercept)                                  | 14.07 | 0.99 | 14.2     | < <b>0.001</b> |
| pH                           | 1.67                                           | 0.30 | 5.5  | < <b>0.001</b> | pH                                           | 1.74  | 0.35 | 5.0      | < <b>0.001</b> |
| log(Clay)                    | 0.39                                           | 0.60 | 0.7  | 0.51           | log(Clay)                                    | 0.36  | 0.66 | 0.5      | 0.59           |
| sqrt(Fe)                     | 5.98                                           | 0.70 | 8.6  | < <b>0.001</b> | sqrt(Fe)                                     | 6.94  | 0.77 | 9.0      | < <b>0.001</b> |
| log(Ca)                      | 0.11                                           | 0.24 | 0.4  | 0.65           | log(Ca)                                      | 0.57  | 0.28 | 2.0      | <b>0.042</b>   |
| MAT                          | 0.19                                           | 0.21 | 0.9  | 0.36           | MAT                                          | -0.09 | 0.24 | -0.3     | 0.73           |
| MAP                          | 0.01                                           | 0.00 | 6.0  | < <b>0.001</b> | MAP                                          | 0.01  | 0.00 | 6.7      | < <b>0.001</b> |
| NPP                          | -0.95                                          | 4.56 | -0.2 | 0.83           | NPP                                          | -3.47 | 4.95 | -0.7     | 0.48           |
| Broadleaf%                   | -0.03                                          | 0.01 | -3.6 | < <b>0.001</b> | Broadleaf%                                   | -0.03 | 0.01 | -2.9     | <b>0.005</b>   |
| sqrt(Slope)                  | -0.32                                          | 0.10 | -3.2 | <b>0.002</b>   | sqrt(Slope)                                  | -0.50 | 0.12 | -4.3     | < <b>0.001</b> |
| DF                           | 424                                            |      |      |                | 542                                          |       |      |          |                |
| marginal R <sup>2</sup>      | 0.33                                           |      |      |                | 0.30                                         |       |      |          |                |
| conditional R <sup>2</sup>   | 0.38                                           |      |      |                | 0.37                                         |       |      |          |                |
| RMSE (kg C m <sup>-2</sup> ) | 4.6                                            |      |      |                | 6.1                                          |       |      |          |                |

50 Model estimates, standard errors (SE), t statistic and *P*-values are reported ( $P < 0.05$  highlighted in **bold**).

51 Measurement units of independent variables are reported in Table 1.

52 DF is the degrees of freedom. Marginal R<sup>2</sup> includes the variance of the fixed effects, while conditional R<sup>2</sup> both the  
53 fixed and random effects calculated with the R package *performance* (Lüdtke et al., 2021).

54 RMSE is the root mean squared error.

55

## (b) Yasso20 deviations

|                              | Sites excluding Southern Alps<br>( <i>n</i> = 437) |      |      |                  | Sites including waterlogged<br>( <i>n</i> = 556) |       |      |          |                  |
|------------------------------|----------------------------------------------------|------|------|------------------|--------------------------------------------------|-------|------|----------|------------------|
|                              | Estimate                                           | SE   | t    | <i>P</i>         | Estimate                                         | SE    | t    | <i>P</i> |                  |
| (Intercept)                  | 0.97                                               | 1.05 | 0.9  | 0.36             | (Intercept)                                      | -0.67 | 1.28 | -0.5     | 0.60             |
| pH                           | -1.65                                              | 0.31 | -5.3 | <b>&lt;0.001</b> | pH                                               | -1.69 | 0.35 | -4.8     | <b>&lt;0.001</b> |
| log(Clay)                    | 0.02                                               | 0.61 | 0.0  | 0.97             | log(Clay)                                        | 0.02  | 0.67 | 0.0      | 0.98             |
| sqrt(Fe)                     | -6.10                                              | 0.71 | -8.6 | <b>&lt;0.001</b> | sqrt(Fe)                                         | -6.98 | 0.79 | -8.9     | <b>&lt;0.001</b> |
| log(Ca)                      | -0.29                                              | 0.24 | -1.2 | 0.24             | log(Ca)                                          | -0.76 | 0.28 | -2.7     | <b>0.007</b>     |
| MAT                          | -0.71                                              | 0.18 | -3.9 | <b>&lt;0.001</b> | MAT                                              | -0.29 | 0.21 | -1.4     | 0.16             |
| MAP                          | -0.01                                              | 0.00 | -5.7 | <b>&lt;0.001</b> | MAP                                              | -0.01 | 0.00 | -6.0     | <b>&lt;0.001</b> |
| Broadleaf%                   | 0.03                                               | 0.01 | 3.7  | <b>&lt;0.001</b> | Broadleaf%                                       | 0.03  | 0.01 | 3.1      | <b>0.002</b>     |
| sqrt(Slope)                  | 0.33                                               | 0.11 | 3.1  | <b>0.002</b>     | sqrt(Slope)                                      | 0.50  | 0.12 | 4.2      | <b>&lt;0.001</b> |
| DF                           | 425                                                |      |      |                  | 543                                              |       |      |          |                  |
| marginal R <sup>2</sup>      | 0.30                                               |      |      |                  | 0.25                                             |       |      |          |                  |
| conditional R <sup>2</sup>   | 0.41                                               |      |      |                  | 0.37                                             |       |      |          |                  |
| RMSE (kg C m <sup>-2</sup> ) | 4.7                                                |      |      |                  | 6.2                                              |       |      |          |                  |

56 Model estimates, standard errors (SE), t statistic and *P*-values are reported (*P* < 0.05 highlighted in **bold**).

57 Measurement units of independent variables are reported in Table 1.

58 DF is the degrees of freedom. Marginal R<sup>2</sup> includes the variance of the fixed effects, while conditional R<sup>2</sup> both the  
59 fixed and random effects calculated with the R package *performance* (Lüdtke et al., 2021).

60 RMSE is the root mean squared error.

61 **Table S5. Additional analysis of drivers of total SOC stocks by biogeographic regions.** Effects of soil properties in the upper 30 cm mineral  
62 soil (i.e. pH, clay content, exchangeable contents of Fe and Ca), MAT (mean annual temperature), MAP (mean annual precipitation), NPP (net  
63 primary production), percentage of broadleaves and slope on total SOC stocks in kg C m<sup>-2</sup>. Linear models were developed separately for each region  
64 excluding waterlogged soils (total  $n = 468$ ).

|                                 | Jura<br>( $n = 54$ ) |                  |                     | Plateau<br>( $n = 164$ ) |          |                     | Pre-Alps<br>( $n = 138$ ) |             |                     | Alps<br>( $n = 81$ ) |          |                     | Southern Alps<br>( $n = 31$ ) |                  |                     |
|---------------------------------|----------------------|------------------|---------------------|--------------------------|----------|---------------------|---------------------------|-------------|---------------------|----------------------|----------|---------------------|-------------------------------|------------------|---------------------|
|                                 | Estimate             | <i>P</i>         | %<br>R <sup>2</sup> | Estimate                 | <i>P</i> | %<br>R <sup>2</sup> | Estimate                  | <i>P</i>    | %<br>R <sup>2</sup> | Estimate             | <i>P</i> | %<br>R <sup>2</sup> | Estimate                      | <i>P</i>         | %<br>R <sup>2</sup> |
| (Intercept)                     | 13.56                | <b>&lt;0.001</b> | -                   | (Intercept)              | 10.21    | <b>&lt;0.001</b>    | -                         | (Intercept) | 13.61               | <b>&lt;0.001</b>     | -        | (Intercept)         | 13.01                         | <b>&lt;0.001</b> | -                   |
| pH                              | 0.58                 | 0.59             | 20                  | pH                       | 1.29     | <b>0.001</b>        | 8                         | pH          | 2.47                | <b>&lt;0.001</b>     | 10       | pH                  | 0.99                          | 0.25             | 4                   |
| Clay                            | 0.01                 | 0.85             | 8                   | log(Clays)               | 2.02     | <b>0.022</b>        | 12                        | Clay        | 0.05                | 0.27                 | 2        | log(Clays)          | -0.70                         | 0.70             | 2                   |
| sqrt(Fe)                        | 2.25                 | 0.41             | 6                   | sqrt(Fe)                 | 5.47     | <b>&lt;0.001</b>    | 33                        | sqrt(Fe)    | 5.78                | <b>&lt;0.001</b>     | 30       | sqrt(Fe)            | 6.03                          | <b>0.004</b>     | 31                  |
| Ca                              | 0.02                 | <b>0.021</b>     | 44                  | log(Ca)                  | -0.11    | 0.72                | 3                         | log(Ca)     | -0.51               | 0.20                 | 6        | log(Ca)             | 0.73                          | 0.37             | 3                   |
| MAT                             | 0.03                 | 0.97             | 5                   | MAT                      | 0.15     | 0.81                | 3                         | MAT         | 0.38                | 0.41                 | 6        | MAT                 | 0.68                          | 0.17             | 14                  |
| MAP                             | 0.00                 | 0.76             | 2                   | MAP                      | 0.01     | <b>&lt;0.001</b>    | 25                        | MAP         | 0.01                | <b>&lt;0.001</b>     | 12       | MAP                 | 0.01                          | 0.06             | 20                  |
| NPP                             | -5.85                | 0.70             | 1                   | NPP                      | 4.57     | 0.48                | 1                         | NPP         | -2.49               | 0.78                 | 2        | NPP                 | 0.98                          | 0.95             | 9                   |
| Broadleaf%                      | -0.04                | 0.09             | 10                  | Broadleaf%               | 0.00     | 0.72                | 6                         | Broadleaf%  | -0.06               | <b>&lt;0.001</b>     | 30       | Broadleaf%          | -0.04                         | 0.33             | 3                   |
| Slope                           | -0.04                | 0.18             | 5                   | sqrt(Slope)              | -0.43    | <b>&lt;0.001</b>    | 9                         | Slope       | -0.01               | 0.58                 | 1        | Slope               | -0.05                         | 0.08             | 13                  |
| DF                              | 44                   |                  |                     |                          | 154      |                     |                           |             | 128                 |                      |          |                     | 71                            |                  |                     |
| adj R <sup>2</sup>              | 0.23                 |                  |                     |                          | 0.37     |                     |                           |             | 0.42                |                      |          |                     | 0.20                          |                  |                     |
| RMSE<br>(kg C m <sup>-2</sup> ) | 3.7                  |                  |                     |                          | 3.4      |                     |                           |             | 4.5                 |                      |          |                     | 5.9                           |                  |                     |

65 Model estimates and *P*-values are reported ( $P < 0.05$  highlighted in **bold**). The relative contribution of each variable to the model variance (%R<sup>2</sup>) was calculated  
66 with the R package *relaimpo* with metrics normalized to sum to 100% (Groemping and Matthias, 2018).

67 Measurement units of independent variables are reported in Table 1.

68 DF is the degrees of freedom. Adj R<sup>2</sup> is the adjusted R<sup>2</sup>.

69 RMSE is the root mean squared error.

70 **Table S6. Drivers of organic layer SOC stocks.** Effects of pH in the upper 30 cm mineral soil, MAT  
71 (mean annual temperature), MAP (mean annual precipitation), NPP (net primary production), percentage  
72 of broadleaves and slope on organic layer SOC stocks (transformed with natural logarithm to meet model  
73 assumptions) in kg C m<sup>-2</sup>. Linear mixed-effect model with region as random intercept was developed for  
74 all sites excluding waterlogged soils. Among soil properties, only pH was included as predictor since  
75 organic layer SOC stocks are generally not stabilized in the long-term against microbial decomposition by  
76 organo-mineral associations (Prietz et al., 2020).

|                              | All sites ( <i>n</i> = 468) |      |      |                  |
|------------------------------|-----------------------------|------|------|------------------|
|                              | Estimate                    | SE   | t    | <i>P</i>         |
| (Intercept)                  | 0.19                        | 0.10 | 1.9  | 0.06             |
| pH                           | -0.34                       | 0.04 | -9.6 | <b>&lt;0.001</b> |
| MAT                          | -0.02                       | 0.04 | -0.6 | 0.58             |
| MAP                          | 0.00                        | 0.00 | 0.0  | 0.98             |
| NPP                          | -0.79                       | 0.86 | -0.9 | 0.36             |
| Broadleaf%                   | -0.01                       | 0.00 | -5.4 | <b>&lt;0.001</b> |
| sqrt(Slope)                  | 0.00                        | 0.02 | -0.2 | 0.82             |
| DF                           | 457                         |      |      |                  |
| marginal R <sup>2</sup>      | 0.31                        |      |      |                  |
| conditional R <sup>2</sup>   | 0.34                        |      |      |                  |
| RMSE (kg C m <sup>-2</sup> ) | 1.0                         |      |      |                  |

77 Model estimates, standard errors (SE), t statistic and *P*-values are reported (*P* < 0.05 highlighted in **bold**).  
78 Measurement units of independent variables are reported in Table 1.  
79 DF is the degrees of freedom. Marginal R<sup>2</sup> includes the variance of the fixed effects, while conditional R<sup>2</sup> both the  
80 fixed and random effects calculated with the R package *performance* (Lüdtke et al., 2021).  
81 RMSE is the root mean squared error.

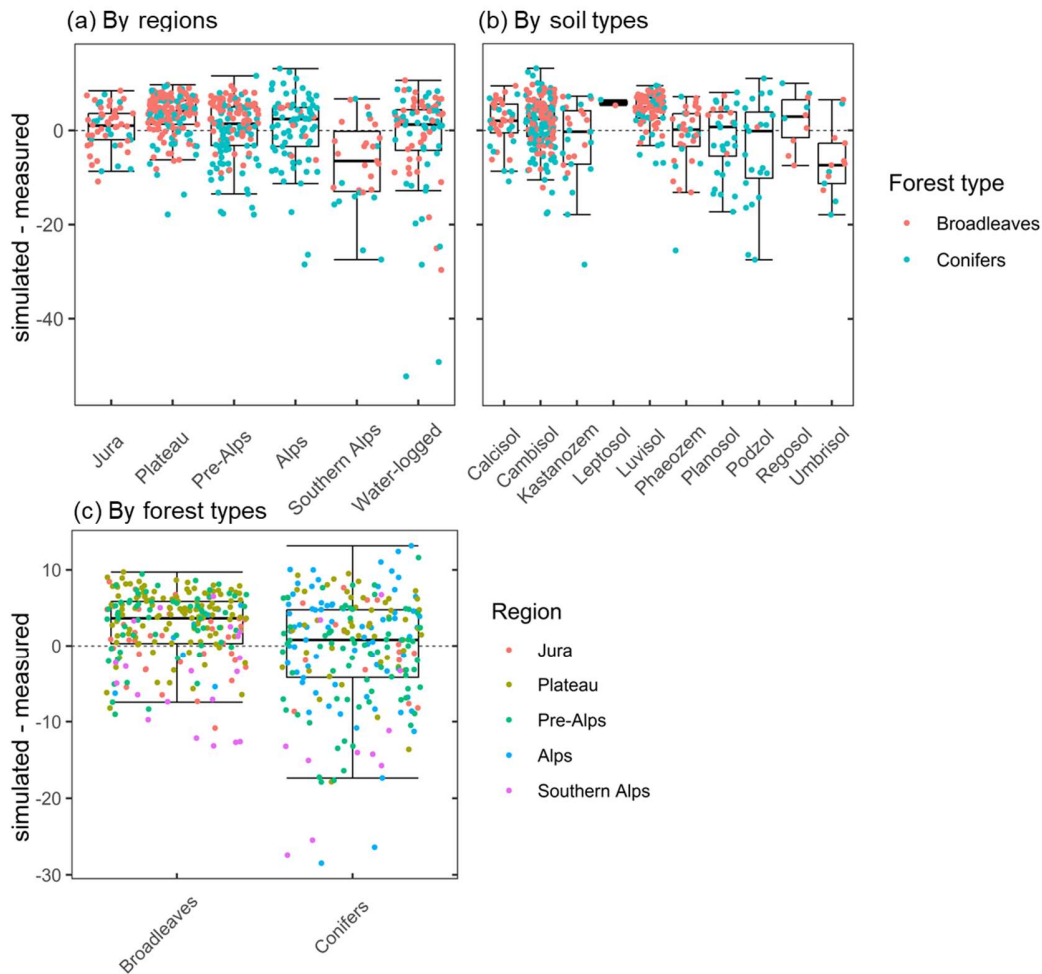

82

83 **Fig. S1.** Yasso20 deviations (i.e. simulated minus measured values of total SOC stocks) in  $\text{kg C m}^{-2}$  by: (a)  
 84 biogeographic regions of Switzerland with waterlogged soils shown separately, (b) soil types, and (c) forest  
 85 types, with (b) and (c) excluding water-logged soils. The box represents the median (50<sup>th</sup> percentile), 25<sup>th</sup>  
 86 and 75<sup>th</sup> percentile of the data. The whiskers represent 1.5 times the inter-quartile range and points more  
 87 than 1.5 times the interquartile range are plotted individually. Total  $n$  sites = 556, while excluding  
 88 waterlogged soils  $n = 468$ . The dashed line indicates the zero line for deviations.



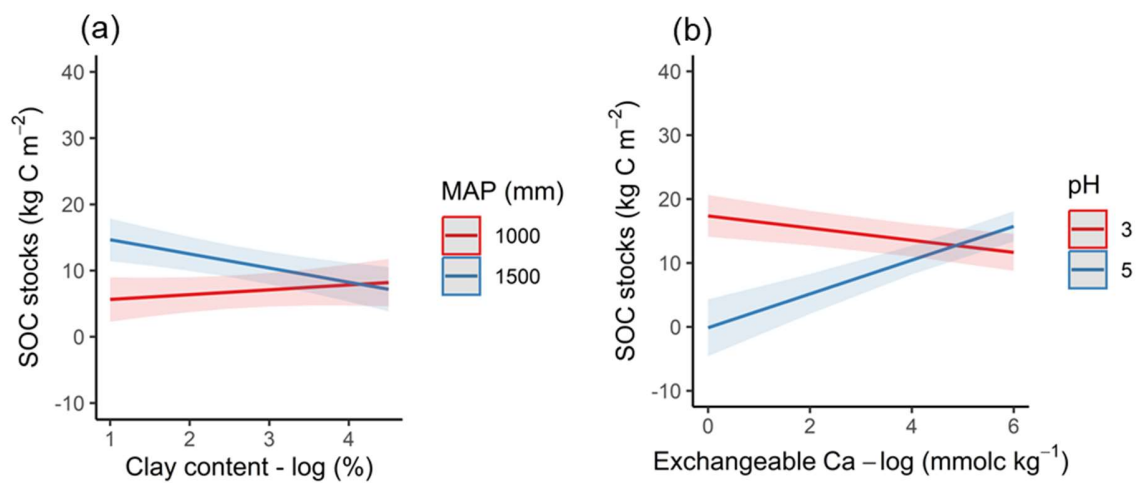

89

90 **Fig. S2.** Interactive effect of (a) mean annual precipitation (MAP) with log-transformed (i.e. natural  
 91 logarithmic scale) clay content, and (b) of pH with log-transformed exchangeable Ca on total SOC stocks.  
 92 The full statistical models including interactions are shown in Table S2. Interactions are visualized using  
 93 the R package *sjPlot*, version 2.8.16 (Lüdecke, 2024).

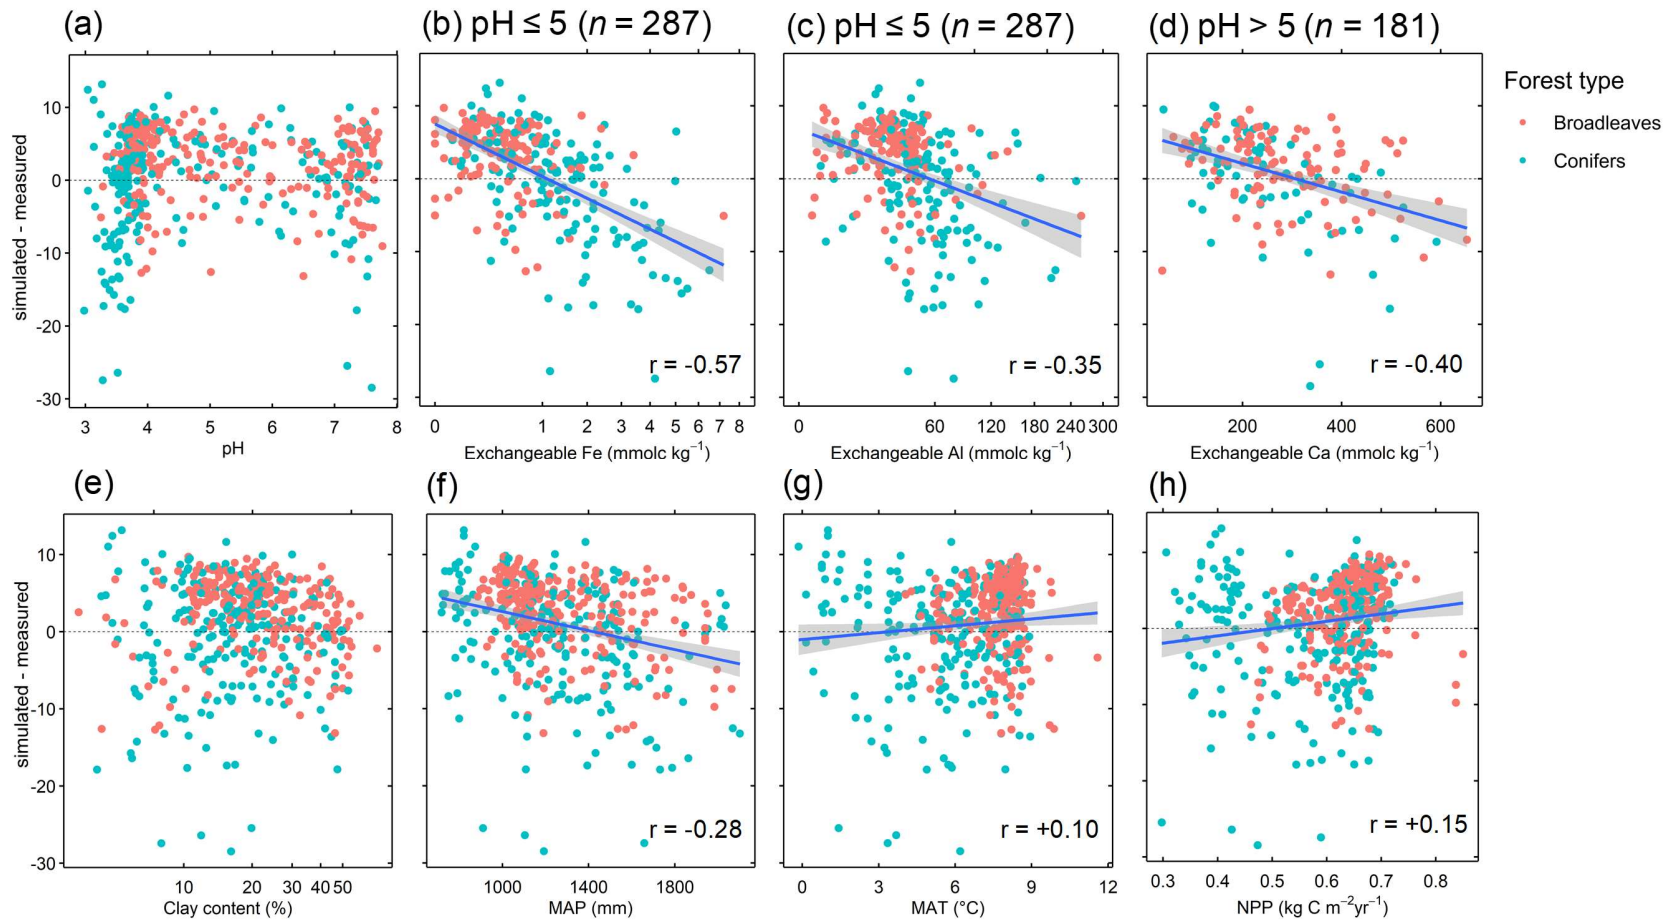

94

95 **Fig. S3.** Correlations between Yasso20 deviations (i.e. simulated minus measured total SOC stocks, in kg C m<sup>-2</sup>), selected soil properties  
 96 (exchangeable Fe and Al shown on a square-root scale axis, clay on a natural-logarithm scale axis) and site variables (MAP = mean annual  
 97 precipitation; MAT = mean annual temperature; NPP = net primary production). Total  $n$  sites = 468 (waterlogged soils excluded). Plotted lines  
 98 show significant linear correlations ( $P < 0.05$ ) with 95% confidence intervals in grey and the Pearson correlation coefficient ( $r$ ).

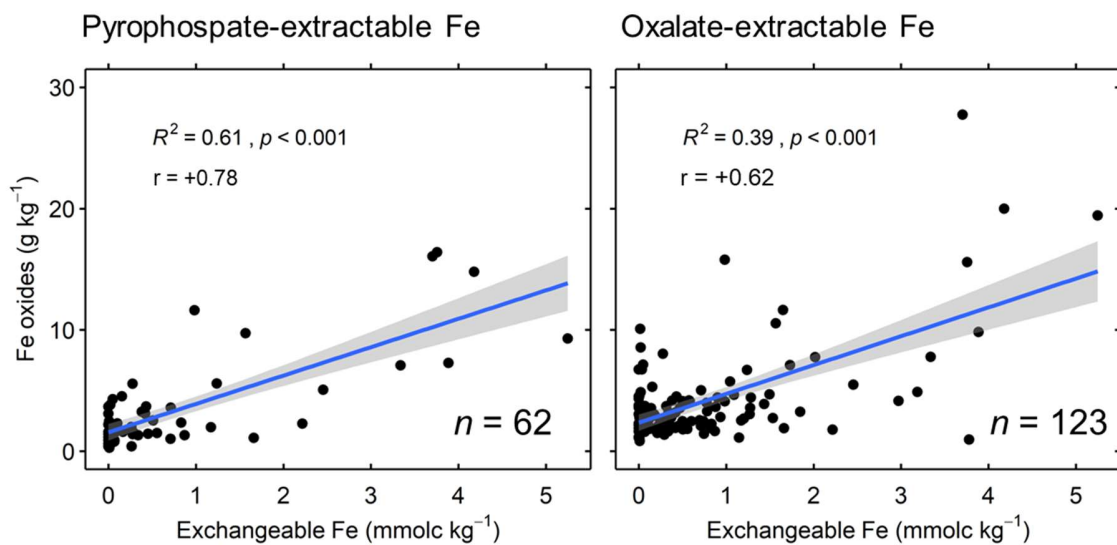

99

100 **Fig. S4.** Relationship between content of exchangeable Fe extracted with  $\text{NH}_4\text{Cl}$  and pedogenic oxides in  
 101 surface mineral soils (0-30 cm depth). Pyrophosphate-extractable Fe (organically bound Fe-oxides) and  
 102 oxalate-extractable Fe (poorly crystalline Fe-oxides) were extracted according to Schwertmann et al.  
 103 (1987). Plotted lines show significant linear correlations only when significant ( $P < 0.05$ ) with 95%  
 104 confidence intervals in grey.  $R^2$  values are coefficient of determination, and  $r$  is the Pearson correlation  
 105 coefficient.

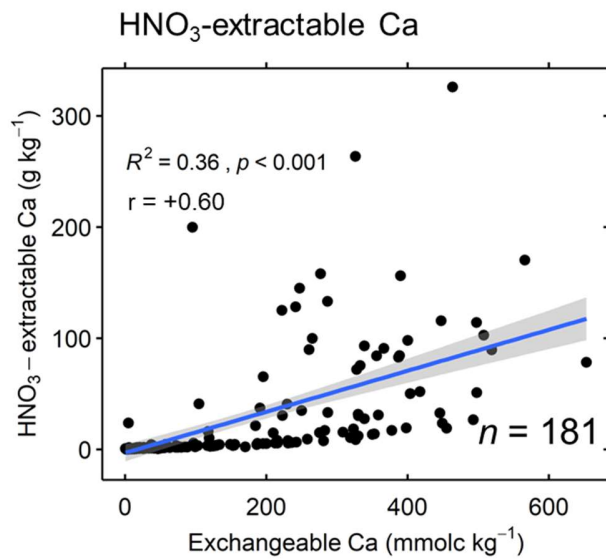

106

107 **Fig. S5.** Relationship between content of exchangeable Ca extracted with NH<sub>4</sub>Cl and HNO<sub>3</sub>-extractable Ca  
 108 in surface mineral soils, 0-30 cm depth ( $n = 181$  plots). Plotted lines show significant linear correlations  
 109 only when significant ( $P < 0.05$ ) with 95% confidence intervals in grey.  $R^2$  values are coefficient of  
 110 determination, and  $r$  is the Pearson correlation coefficient.

111 **References**

112 Groemping, U. and Matthias, L.: Package ‘relaimpo’, Relative importance of regressors in linear models  
 113 (R package version), 2018.

114 Lüdecke, D.: sjPlot: Data visualization for statistics in social science, R package version 2.8.16, 2024.

115 Lüdecke, D., Ben-Shachar, M. S., Patil, I., Waggoner, P., and Makowski, D.: performance: An R package  
 116 for assessment, comparison and testing of statistical models, Journal of Open Source Software, 6,  
 117 2021.

118 Prietzel, J., Hiesch, S., Harrington, G., and Müller, S.: Microstructural and biochemical diversity of forest  
 119 soil organic surface layers revealed by density fractionation, Geoderma, 366, 114262, 2020.

120 Schwertmann, U., Süsser, P., and Nätscher, L.: Protonenpuffersubstanzen in Böden, Zeitschrift für  
 121 Pflanzenernährung und Bodenkunde, 150, 174-178, 1987.

122
